# Supplementary material for: Theoretical and experimental study of the antifreeze protein AFP752, trehalose and dimethyl sulfoxide cryoprotection mechanism: correlation with cryopreserved cell viability
Source: Royal Society of Chemistry journal article supplement (doi:10.1039/c6ra25095e), 2016-12-24
Supplement: c6ra25095e1.pdf [file c6ra25095e1.pdf]

## Theoretical and experimental study of antifreeze protein AFP752, trehalose and dimethyl sulfoxide cryoprotection mechanism: correlation with cryopreserved cell viability – Supplementary material

Irena Kratochvílová<sup>1\*</sup>, Martin Golan<sup>1,6</sup>, Karel Pomeisl<sup>1</sup>, Jan Richter<sup>1</sup>, Silvia Sedláková<sup>1</sup>, Jakub Šebera<sup>1</sup>, Júlia Mičová<sup>1,7</sup>, Martin Falk<sup>2</sup>, Iva Falková<sup>2</sup>, David Řeha<sup>3,8</sup>, K. Wade Elliott<sup>4</sup>, Krisztina Varga<sup>4</sup>, Shelby E. Follett<sup>5</sup> and Daniel Šimek<sup>1</sup>

<sup>1</sup> Institute of Physics, Academy of Sciences of the Czech Republic, v.v.i., Na Slovance 2, CZ-182 21, Prague 8, Czech Republic

<sup>2</sup> Institute of Biophysics, Academy of Sciences of the Czech Republic, v.v.i., Kralovopolska 135, CZ-612 65 Brno, Czech Republic

<sup>3</sup> Institute of Microbiology, Academy of Sciences of the Czech Republic, v.v.i., Zámek 136, CZ-373 33 Nové Hrady, Czech Republic

<sup>4</sup> Department of Molecular, Cellular, and Biomedical Sciences, University of New Hampshire, 46 College Road, Durham, NH, 03824, USA

<sup>5</sup> Department of Chemistry, University of Wyoming, 1000 E. University Ave, Laramie, WY, 82071, USA

<sup>6</sup> Faculty of Mathematics and Physics, Charles University in Prague, Ke Karlovu 5, CZ-121 16 Prague 2, Czech Republic

<sup>7</sup> Institute of Chemistry, Slovak Academy of Sciences, Dubravská cesta 9, 845 38 Bratislava 4, Slovak Republic

<sup>8</sup> Faculty of Sciences, University of South Bohemia in České Budejovice, Zámek 136, 373 33 Nove Hrady, Czech Republic

## Supplementary Material

### Expression and purification of recombinant TrxA-ApAFP752 fusion protein

The recombinant plasmid pET32b-*Apafp752*<sup>1</sup> was transformed into *Escherichia coli* Rosetta-gami 2(DE3) or BL21 (DE3)pLysS competent cells (Novagen). A single transformed colony was used to inoculate 25 mL of Luria-Bertani (LB) medium containing 0.3 mM ampicillin and cultured overnight at 37 °C and shaken at 225 rpm. 4 mL of the overnight culture was transferred into 1 L of fresh LB medium with 0.3 mM ampicillin and grown at 37 °C and 225 rpm until the optical density at 600 nm (OD<sub>600</sub>) reached 0.6-0.7. The culture was induced with 1 mL of 400 mM isopropanol-1-thio-β-D-galactopyranoside (IPTG), to cause over-expression of TrxA-ApAFP752, for 8 hours at 25 °C. The cells were harvested by centrifugation (20 min, 8700 g, 4 °C) and stored at -80 °C until purification.

The cell pellet was resuspended with ice-cold binding buffer (EDTA-free Halt™ protease inhibitor cocktail (Fisher), 50 mM sodium phosphate, 150 mM NaCl, 20 mM imidazole and Benzonase nuclease (Millipore) at pH 8.0) and lysed using a French press (1300 psi). The lysate was collected and centrifuged (20 min., 27200 g, 4 °C) to remove the cell debris. The supernatant was filtered through a 0.22 μm syringe-driven filter (Millipore) and concentrated to 5 mL before being purified by a Fast Protein Liquid Chromatographer (FPLC; GE Healthcare ÄKTA purifier 900) equipped with a HisTrap HP Ni-NTA column (GE Healthcare). The sample was loaded into the Ni-NTA column, washed with washing buffer

(50 mM sodium phosphate, 150 mM NaCl, 20 mM imidazole at pH 8.0), and eluted with the same buffer containing 500 mM imidazole through a gradient elution. The fractions were pooled and dialysed in sodium phosphate buffer (50 mM sodium phosphate, 150 mM NaCl at pH 8.0) for 2 hours, then switched to fresh buffer and left overnight. The purity of the sample was analysed by 12.5% SDS-PAGE and stained with Coomassie blue; TrxA-ApAFP752 has a molecular weight of 27 kDa and was compared to a stained protein ladder (BioRad). Additional purification steps were taken to obtain a pure sample and SDS-PAGE was used after each step to analyse the purity. The sample was divided into three fractions that were each concentrated to 1 mL and run through a Superdex 75 10/300 GL size exclusion column (GE Healthcare) equilibrated with sodium phosphate buffer. Fractions that were still not pure were run through a Ni-NTA column and dialysed for a second time.

Once the desired purity was obtained, the sample was buffer exchanged into a  $K_xH_yPO_4$  buffer (50 mM potassium phosphate, 20 mM NaCl, and 1 mM  $NaN_3$  at pH 8.0). The concentration was estimated using UV-Visible spectrophotometry at 280 nm with the calculated extinction coefficient of  $19,575 M^{-1}cm^{-1}$ . The sample was concentrated to 1 mL and lyophilized overnight. For further experiments, the protein was rehydrated as needed and buffer exchanged.

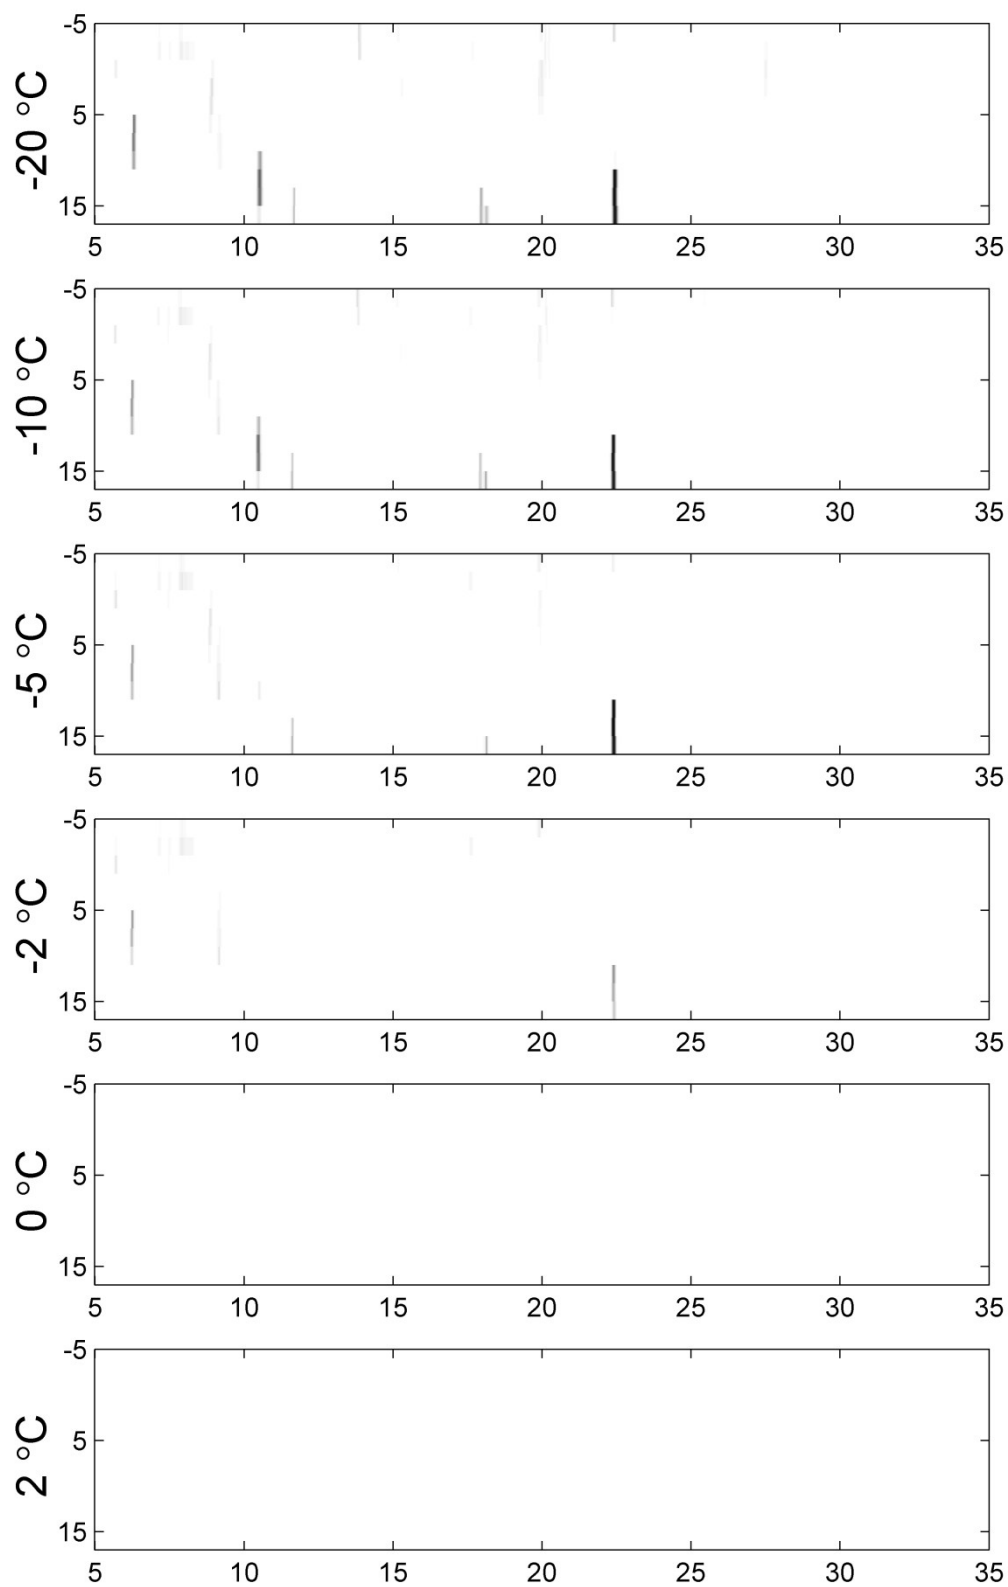

**Fig. S1: Diffraction intensity maps in angular coordinates – pure water.** The melting process (from top to bottom) of water crystals observed on 110 reflection intensities with various orientations.

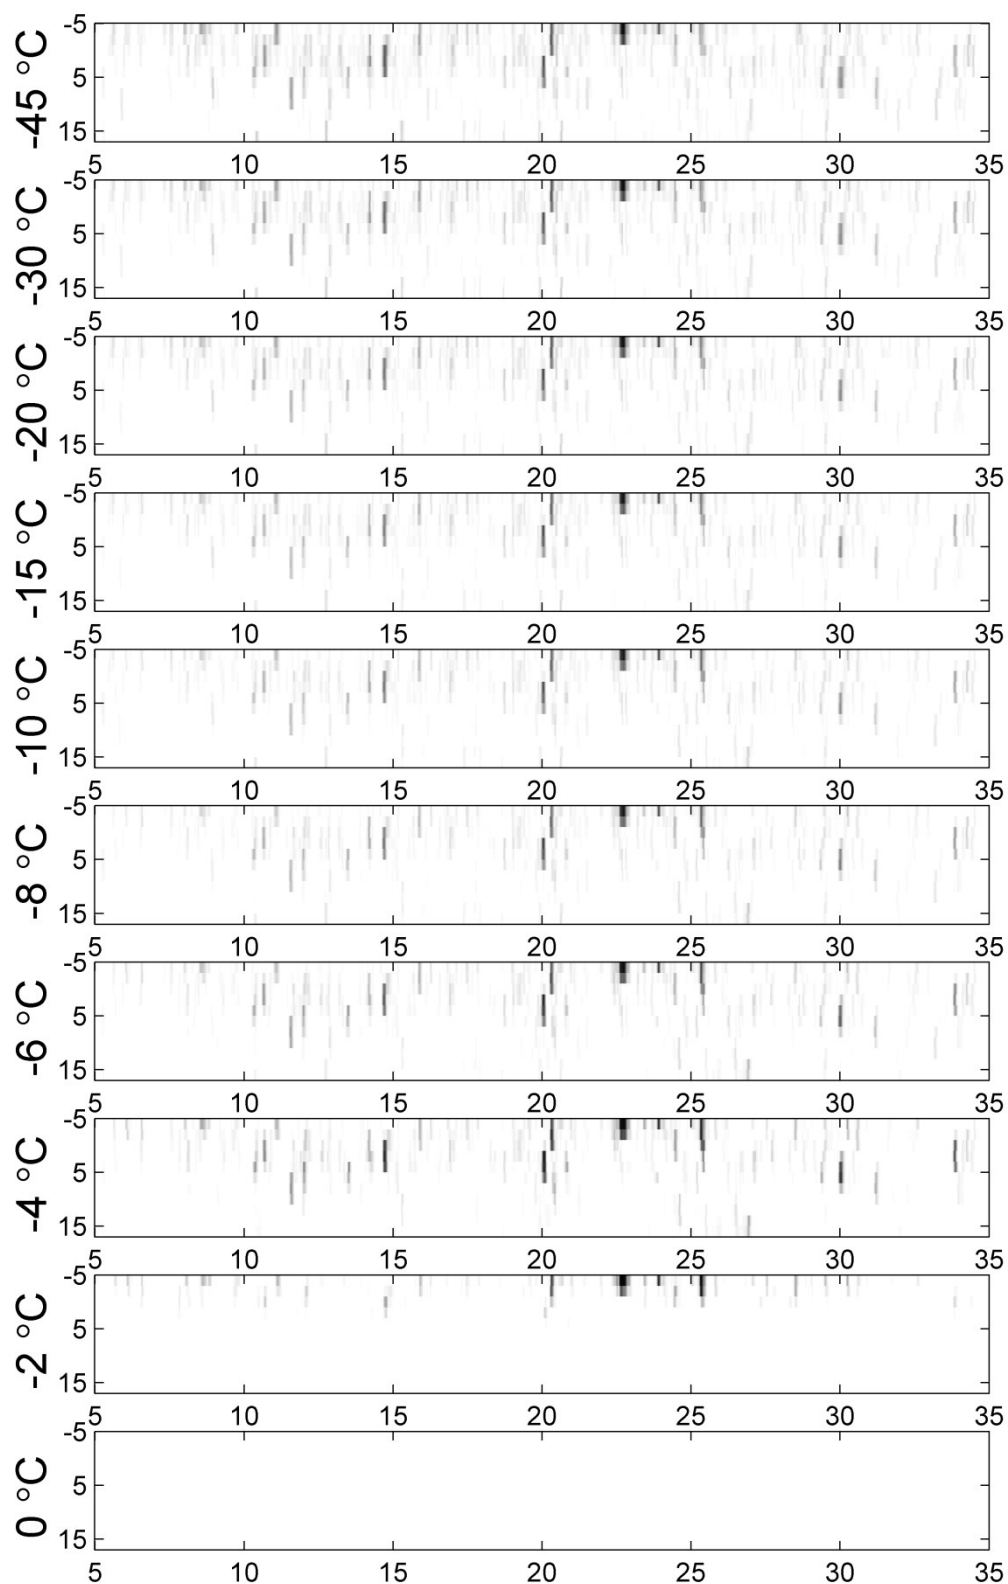

**Fig. S2: Diffraction intensity maps in angular coordinates – 0.05% (w/w) AFP solution.** The melting process (from top to bottom) of water crystals observed on 110 reflection intensities with various orientations.

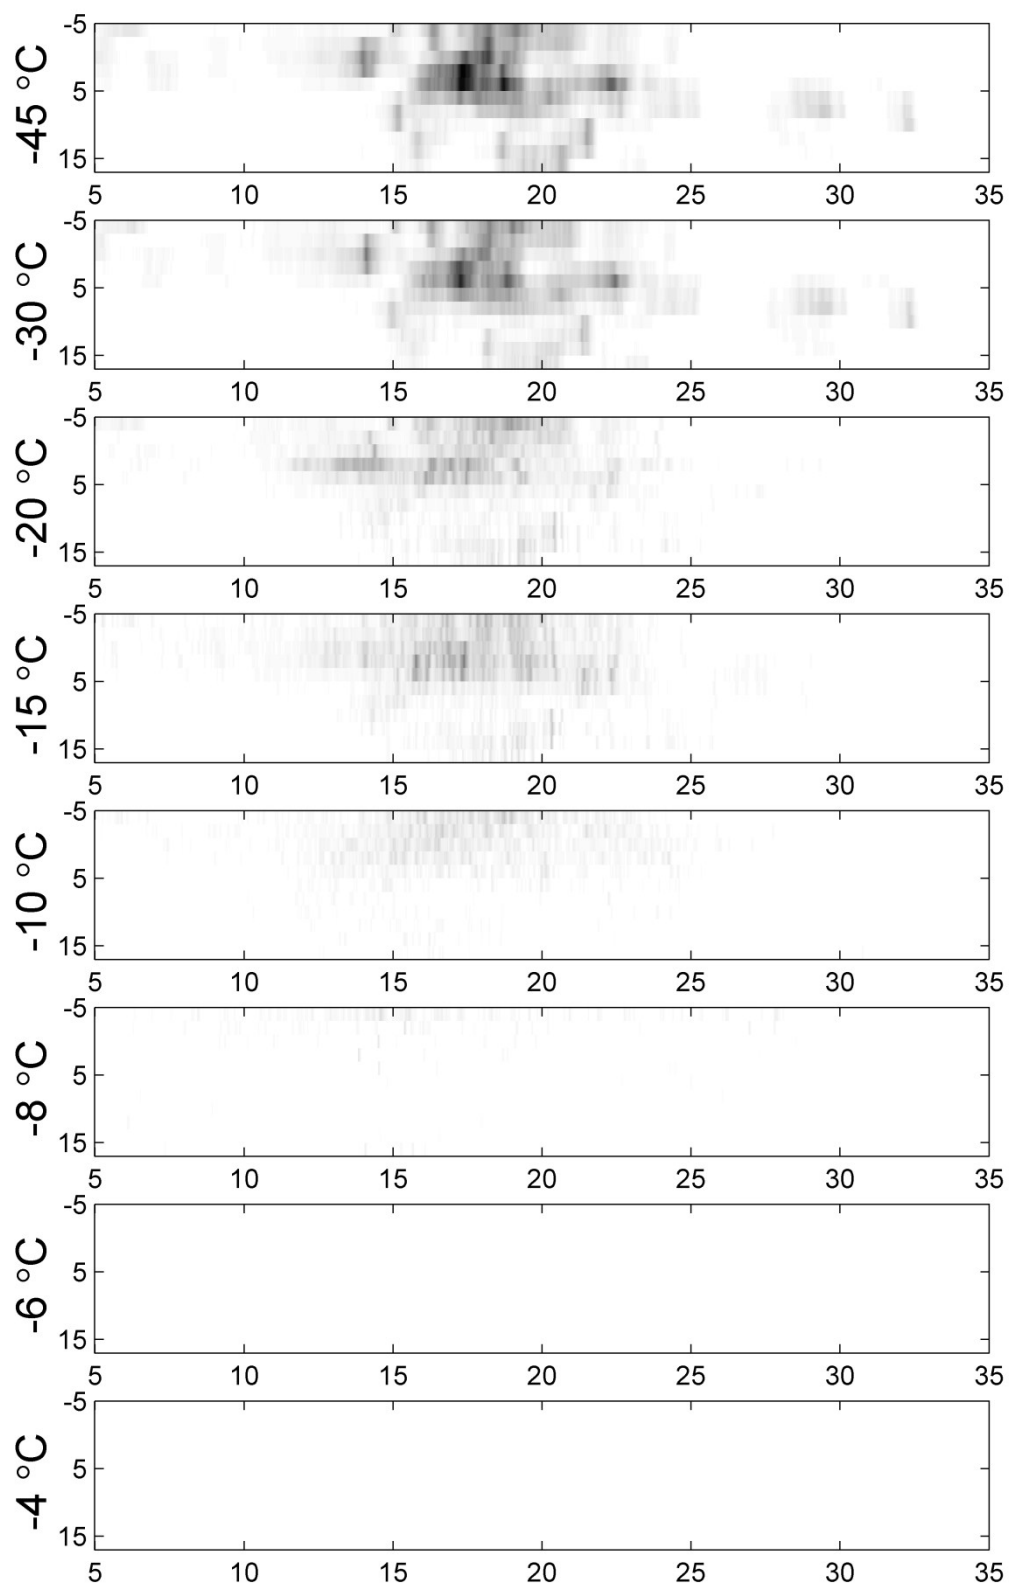

**Fig. S3: Diffraction intensity maps in angular coordinates – 41% (w/w) trehalose solution.** The melting process (from top to bottom) of water crystals observed on 110 reflection intensities with various orientations.

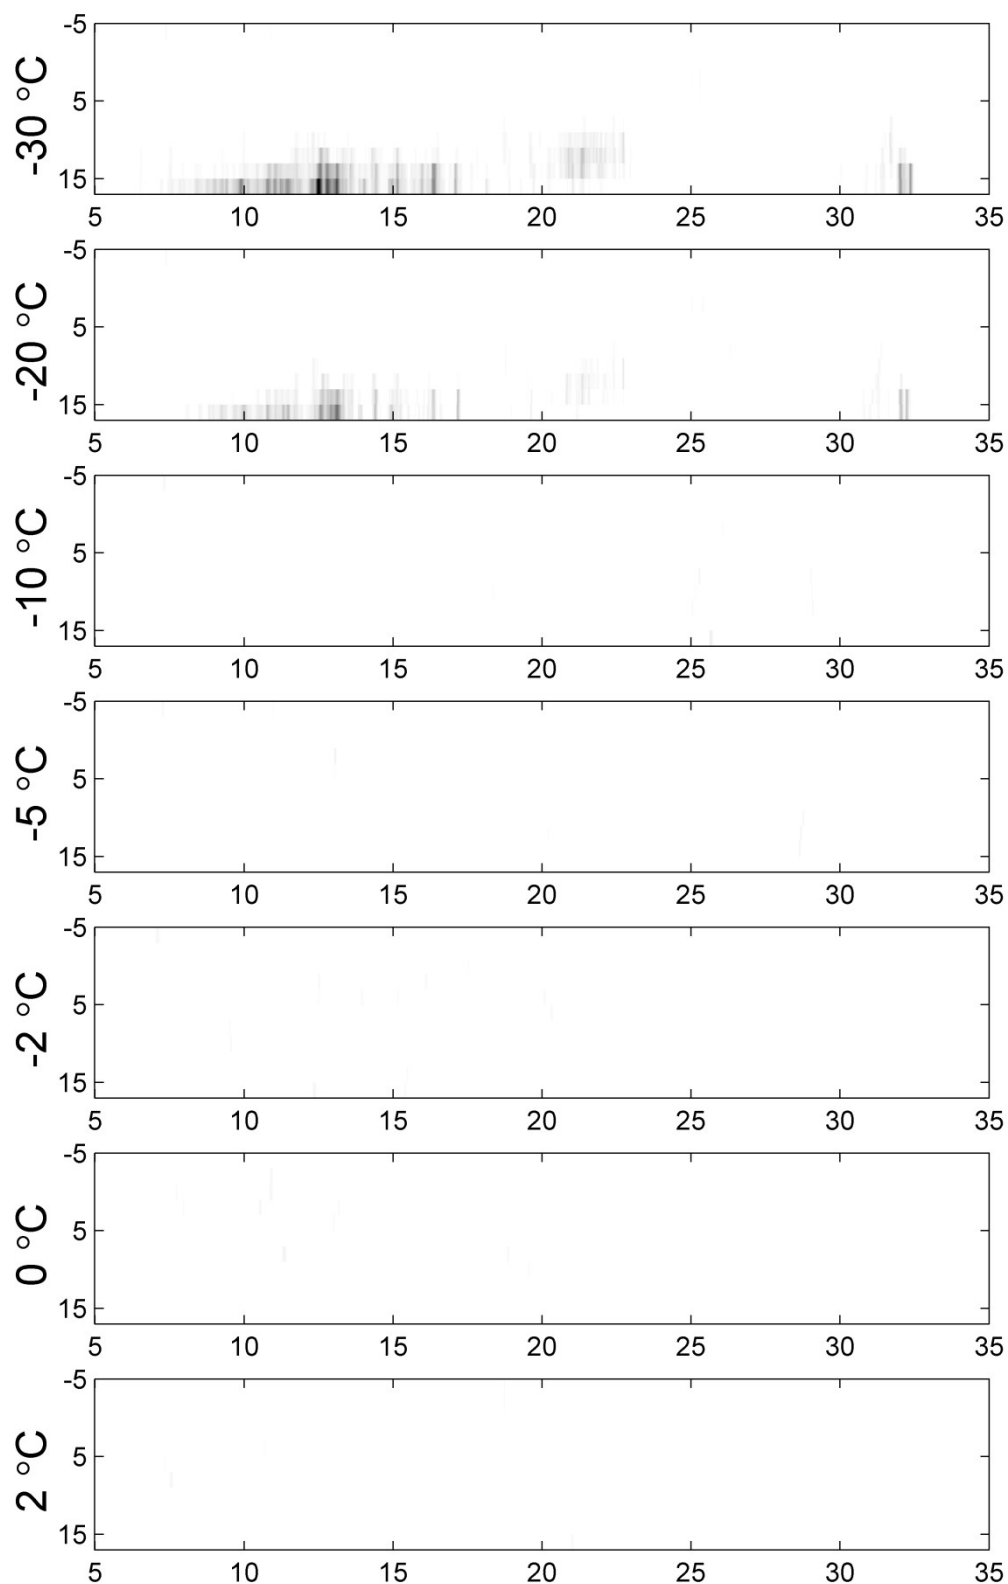

**Fig. S4: Diffraction intensity maps in angular coordinates – 1% (w/w) AFP solution.** The melting process (from top to bottom) of water crystals observed on 110 reflection intensities with various orientations.

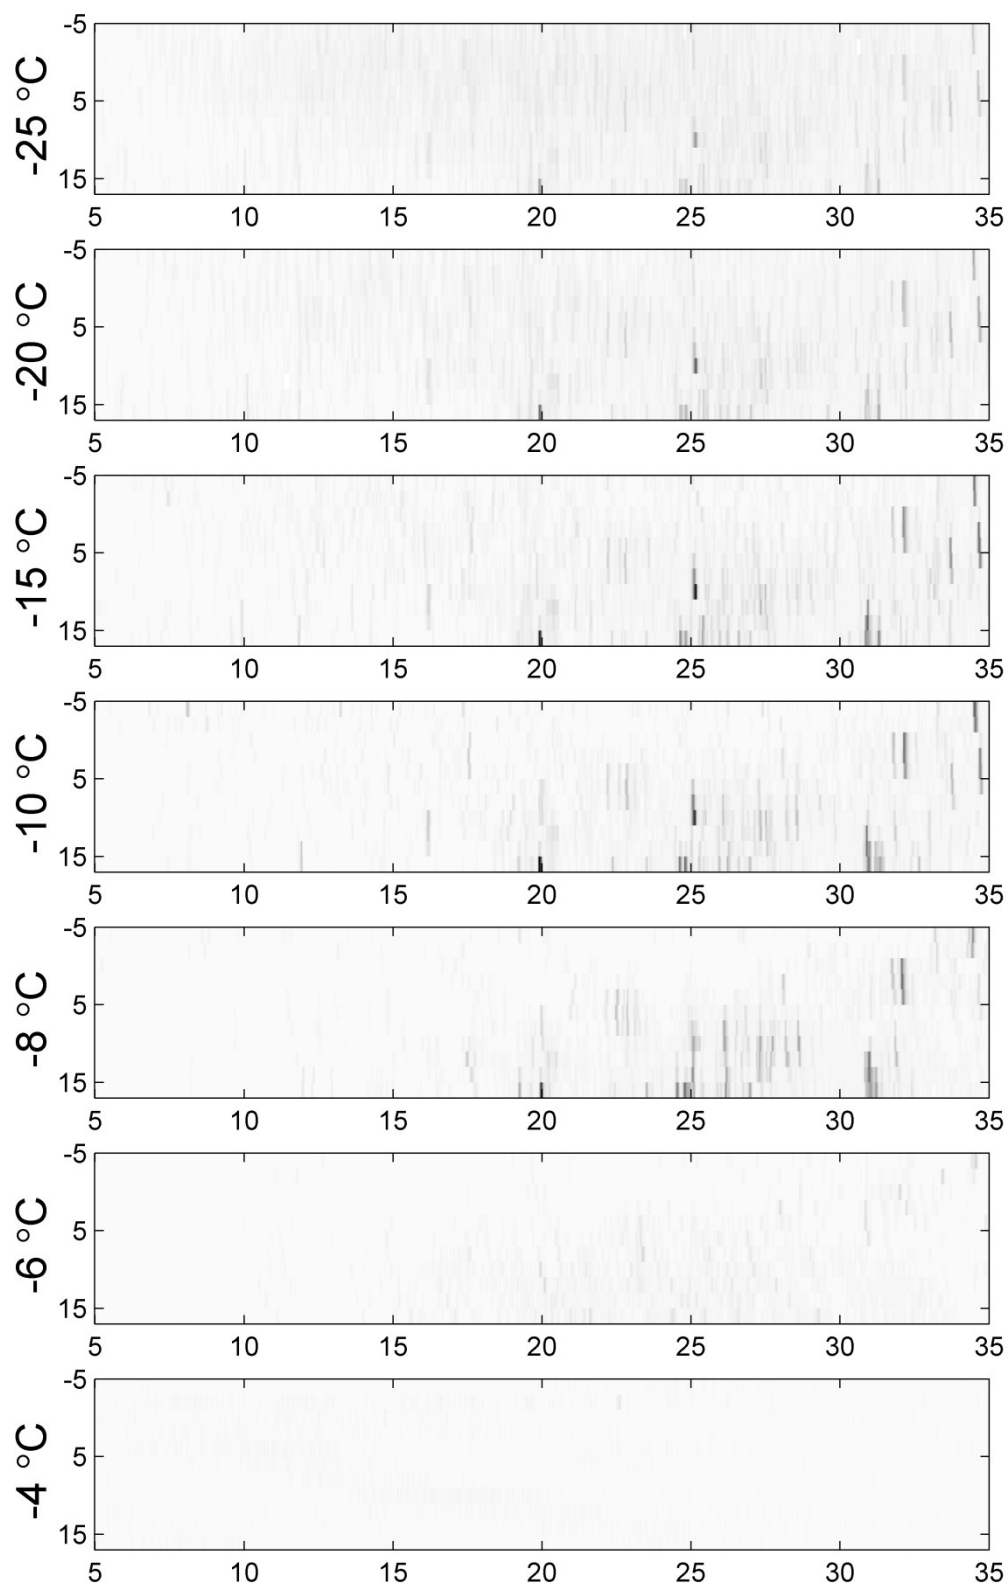

**Fig. S5: Diffraction intensity maps in angular coordinates – 10% (w/w) DMSO solution.** The melting process (from top to bottom) of water crystals observed on 110 reflection intensities with various orientations.

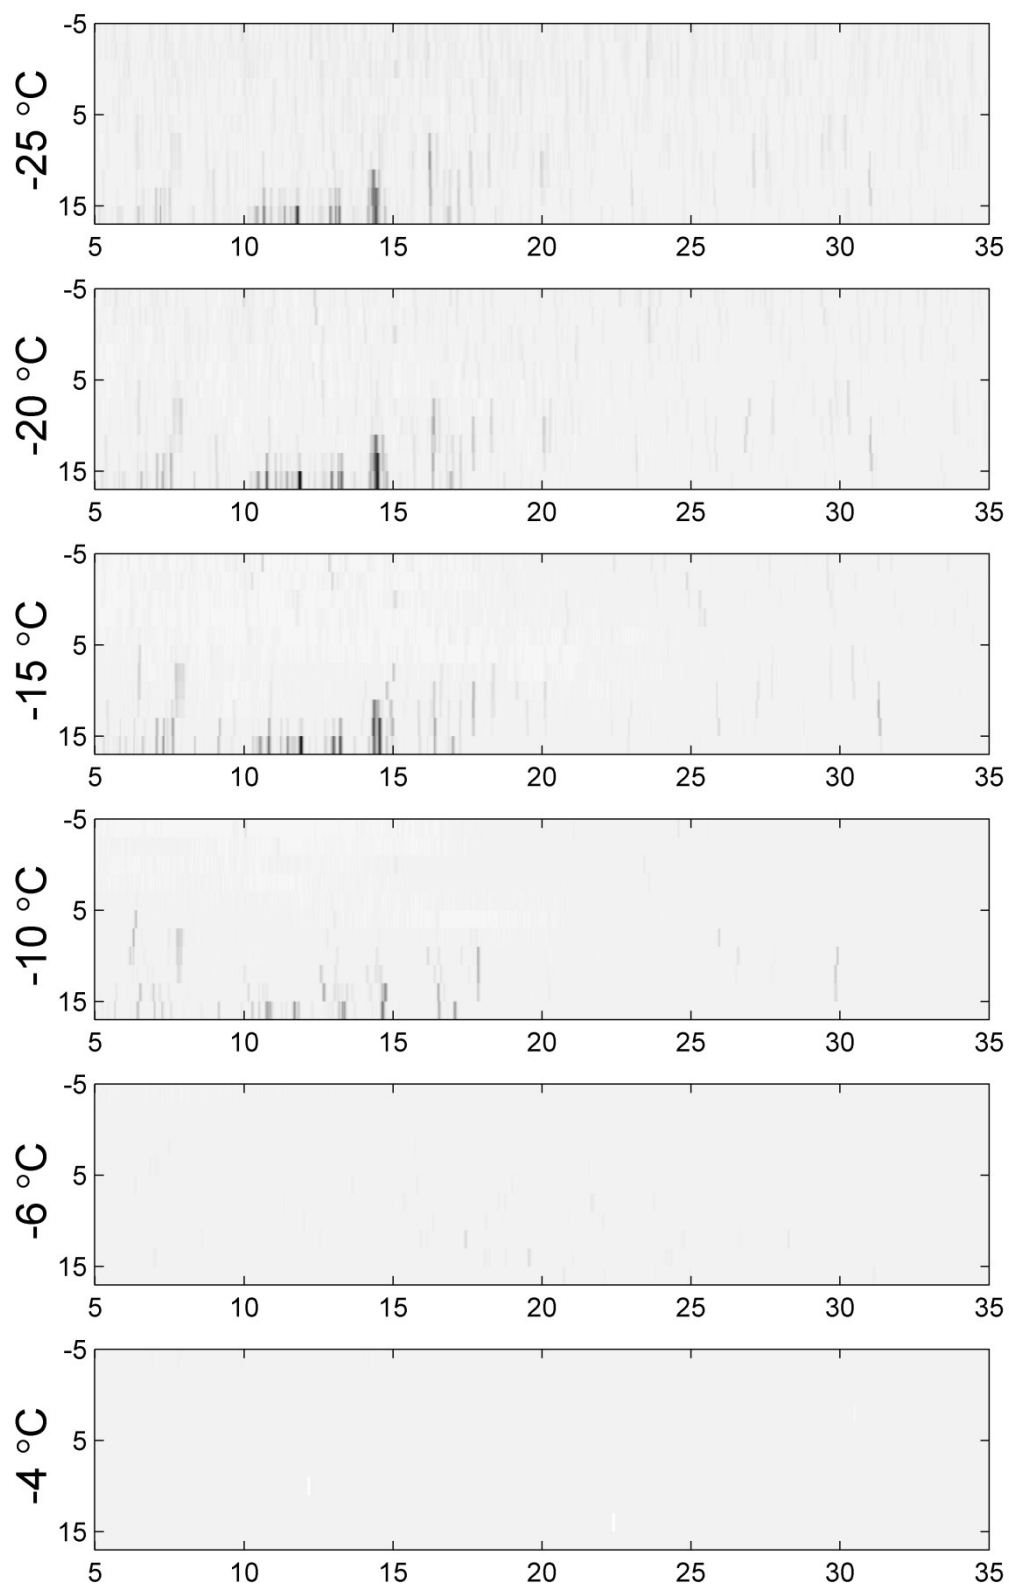

**Fig. S6: Diffraction intensity maps in angular coordinates – 10% (w/w DMSO + 3.2% w/w trehalose solution).** The melting process (from top to bottom) of water crystals observed on 110 reflection intensities with various orientations.



**Table S1:** The calculated interaction energies  $\Delta E_{int}$ , (kcal/mol) of the various types of dimers with and without inclusion of BSSE corrections.

| System                                                                | $\Delta E_{int}$ | $\Delta E_{int}$ (BSSE) |
|-----------------------------------------------------------------------|------------------|-------------------------|
| [H <sub>2</sub> O] <sub>2</sub>                                       | -4.7             | -3.9                    |
| [(CH <sub>3</sub> ) <sub>2</sub> SO] <sub>2</sub>                     | -6.5             | -5.5                    |
| [(CH <sub>3</sub> ) <sub>2</sub> SO...H <sub>2</sub> O]               | -6.8             | -5.9                    |
| [C <sub>12</sub> H <sub>22</sub> O <sub>11</sub> ] <sub>2</sub>       | -11.1            | -7.0                    |
| [C <sub>12</sub> H <sub>22</sub> O <sub>11</sub> ...H <sub>2</sub> O] | -7.4             | -6.2                    |
